# Supplementary material for: Superior performance of Na7V4(P2O7)4PO4 in sodium ion batteries
Source: Royal Society of Chemistry journal article supplement (doi:10.1039/c8ra03682a), 2018-01-01
Supplement: c8ra03682a1.pdf [file c8ra03682a1.pdf]

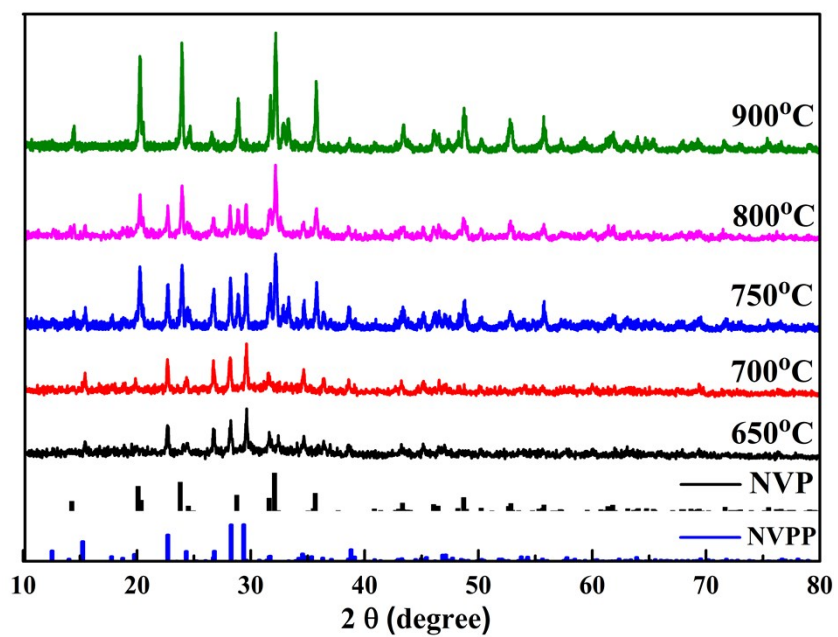

Fig. S1†. Powder XRD patterns of NVPP at different synthesis temperatures range from 650 °C to 900 °C.
